# Supplementary material for: Exploring the isomerization paths of push–pull hexatrienes
Source: Royal Society of Chemistry journal article supplement (doi:10.1039/c6ra16812d), 2016-01-01
Supplement: c6ra16812d1.pdf [file c6ra16812d1.pdf]

# Exploring the isomerization paths of push-pull hexatrienes

## Supporting Information

Anjan Chattopadhyay<sup>\*a</sup>, Praveen Saini<sup>a</sup> and Riddhish Pandharkar<sup>a</sup>

Department of Chemistry, Birla Institute of Technology and Science (BITS), Pilani –K.K. Birla  
Goa Campus, Goa, 403 726, India

**Table S1.** A comparison of radiative transition properties of the different ground state isomers of **polyene I** and **polyene II**

| polyene   | Isomer | Transition moment (Debye)      |                                |                                | Oscillator Strength            |                                |                                | Einstein coefficient (in sec <sup>-1</sup> ) |                                |                                |
|-----------|--------|--------------------------------|--------------------------------|--------------------------------|--------------------------------|--------------------------------|--------------------------------|----------------------------------------------|--------------------------------|--------------------------------|
|           |        | S <sub>0</sub> -S <sub>1</sub> | S <sub>0</sub> -S <sub>2</sub> | S <sub>1</sub> -S <sub>2</sub> | S <sub>0</sub> -S <sub>1</sub> | S <sub>0</sub> -S <sub>2</sub> | S <sub>1</sub> -S <sub>2</sub> | S <sub>0</sub> -S <sub>1</sub>               | S <sub>0</sub> -S <sub>2</sub> | S <sub>1</sub> -S <sub>2</sub> |
| <b>I</b>  | TTT    | 8.444                          | 2.390                          | 2.802                          | 2.420                          | 0.290                          | 0.021                          | 8.41(+9)                                     | 8.49(+8)                       | 4.70(+5)                       |
|           | CTT    | 7.605                          | 3.290                          | 1.601                          | 1.935                          | 0.394                          | 0.007                          | 6.53(+9)                                     | 1.57(+9)                       | 1.90(+5)                       |
|           | TCT    | 7.030                          | 3.618                          | 1.015                          | 1.662                          | 0.481                          | 0.003                          | 5.67(+9)                                     | 1.95(+9)                       | 9.02(+4)                       |
| <b>II</b> | TTT    | 8.245                          | 2.583                          | 2.938                          | 2.444                          | 0.255                          | 0.019                          | 9.54(+9)                                     | 1.12(+9)                       | 3.06(+5)                       |
|           | CTT    | 7.888                          | 2.960                          | 2.310                          | 2.225                          | 0.329                          | 0.010                          | 8.59(+9)                                     | 1.41(+9)                       | 1.07(+5)                       |
|           | TCT    | 6.953                          | 3.875                          | 0.879                          | 1.722                          | 0.570                          | 0.002                          | 6.59(+9)                                     | 2.48(+9)                       | 3.00(+4)                       |

**Table S2.** Absolute energies (in Hartree) of first three low-lying states of some important points at CASPT2 level of calculation.

| Geometries                          | polyene I          |                    |                    | polyene II         |                    |                    |
|-------------------------------------|--------------------|--------------------|--------------------|--------------------|--------------------|--------------------|
|                                     | CASPT2             |                    |                    | CASPT2             |                    |                    |
|                                     | E(S <sub>0</sub> ) | E(S <sub>1</sub> ) | E(S <sub>2</sub> ) | E(S <sub>0</sub> ) | E(S <sub>1</sub> ) | E(S <sub>2</sub> ) |
| GS (TTT)                            | -379.7652          | -379.5964          | -379.5920          | -438.7522          | -438.5749          | -438.5734          |
| ES <sub>a</sub>                     | -379.7253          | -379.6226          | -379.6059          | -438.7189          | -438.6051          | -438.5723          |
| TS <sub>a</sub>                     | -379.6827          | -379.6204          | -379.6067          | -                  | -                  | -                  |
| ES <sub>b</sub>                     | -379.7226          | -379.6215          | -379.6075          | -438.6903          | -438.6031          | -438.5794          |
| ES <sub>b</sub> (90°)               | -379.6899          | -379.6251          | -379.6186          | -438.6645          | -438.6036          | -438.5854          |
| ES <sub>c</sub>                     | -379.7257          | -379.6185          | -379.5997          | -438.7206          | -438.6053          | -438.5739          |
| ES <sub>d</sub>                     | -379.7257          | -379.6185          | -379.5997          | -                  | -                  | -                  |
| CI <sub>a</sub>                     | -379.6149          | -379.6106          | -379.5069          | -438.6059          | -438.6052          | 438.4772           |
| GS (CTT)                            | -379.7618          | -379.5902          | -379.5838          | -438.7543          | -438.5799          | -438.5777          |
| ES(S <sub>2</sub> )                 | -379.6950          | -379.6147          | -379.6073          | -438.6772          | 438.5834           | -438.57802         |
| CI(S <sub>2</sub> /S <sub>1</sub> ) | -379.6889          | -379.5865          | -379.5825          | -438.6741          | -438.5677          | -438.5654          |
| CI <sub>b</sub>                     | -379.6231          | -379.6263          | -379.5730          | -                  | -                  | -                  |
| GS (CCT)                            | -379.7614          | -379.5866          | -379.5840          | -                  | -                  | -                  |
| GS(TCT)                             | -379.7609          | -379.5865          | -379.5845          | -438.7507          | -438.5788          | -438.5738          |
| TS <sub>GS(TCT)</sub>               | -379.6937          | -379.6352          | -379.5775          | -438.6807          | -438.6069          | -438.5779          |
| TS <sub>GS(CTT)</sub>               | -379.6881          | -379.6338          | -379.5980          | -438.6719          | -438.6024          | -438.5792          |
| CI <sub>d</sub>                     | -379.6093          | -379.6086          | -379.4982          | -438.5976          | -438.5960          | -438.4871          |
| GS(TCC)                             | -379.7632          | -379.5949          | -379.5798          | -                  | -                  | -                  |

**Ground state**

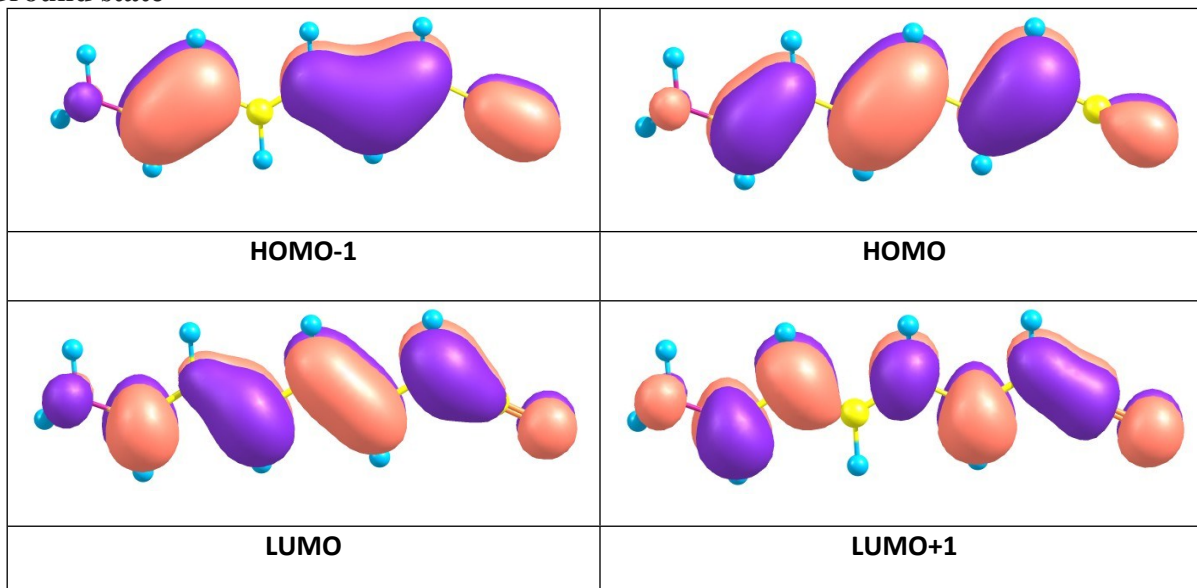

**ES<sub>a</sub>**

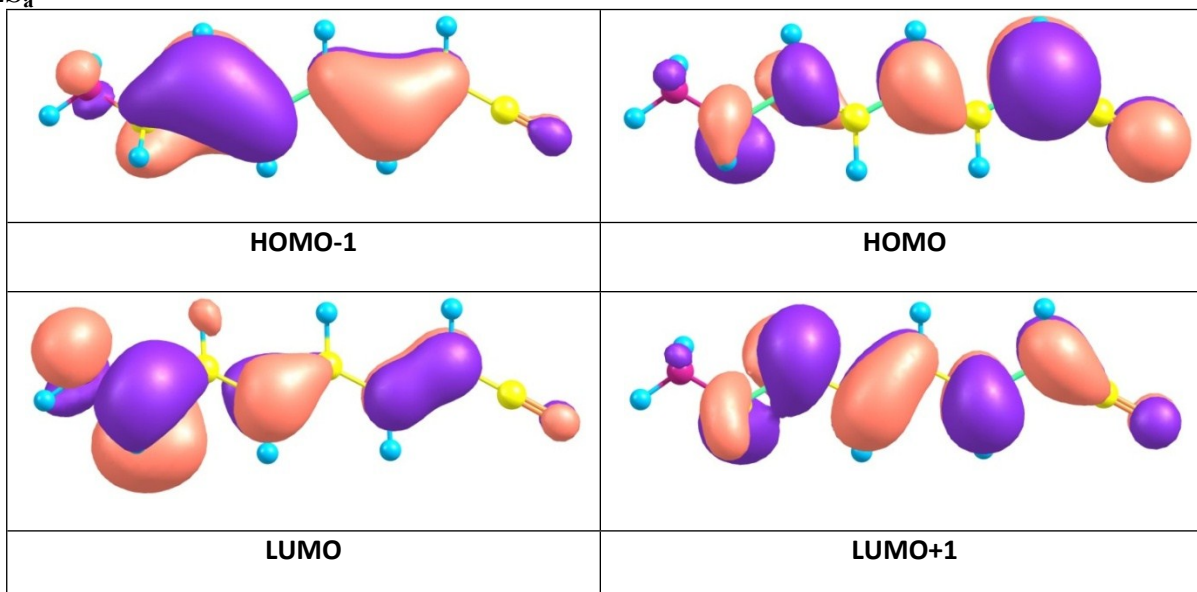

ES<sub>b</sub>

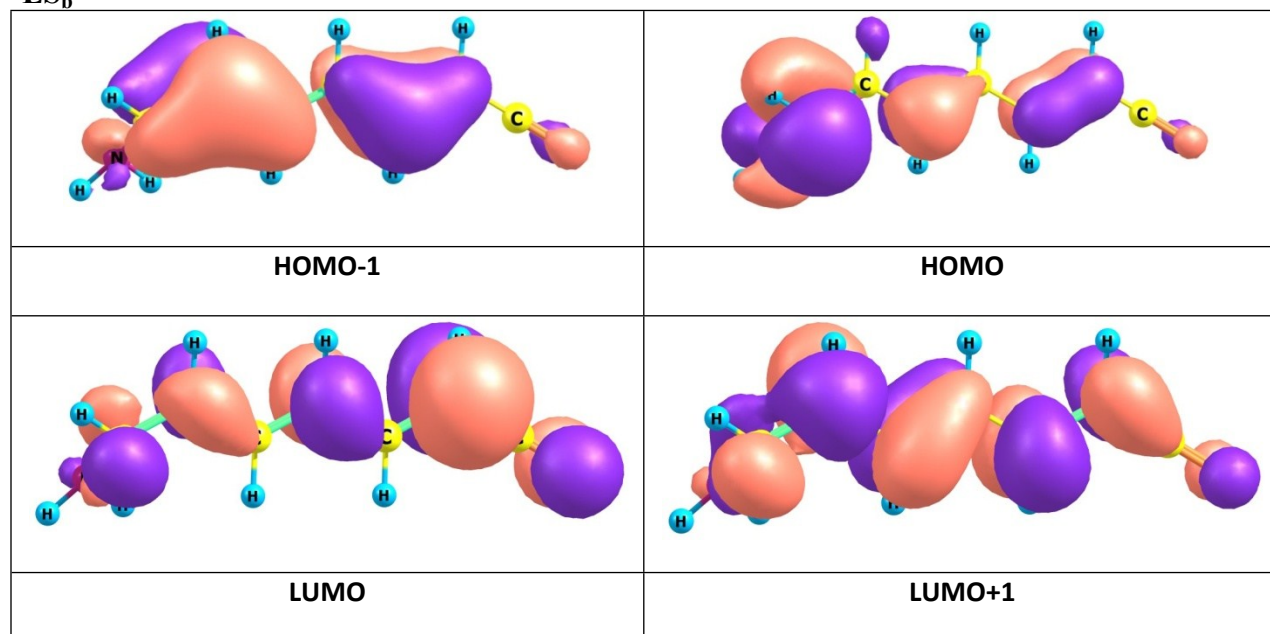

ES<sub>c</sub>

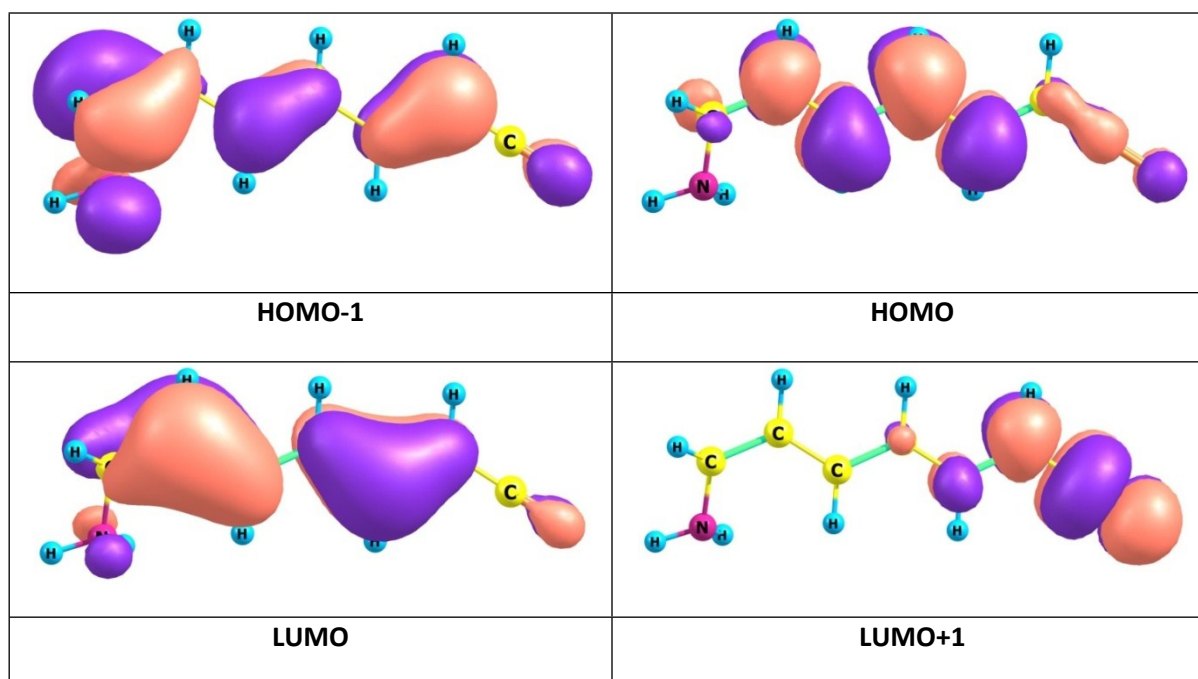

**Figure S1:** Some (10,10) active space orbitals of **polyene I** (TTT isomer) at different geometries.

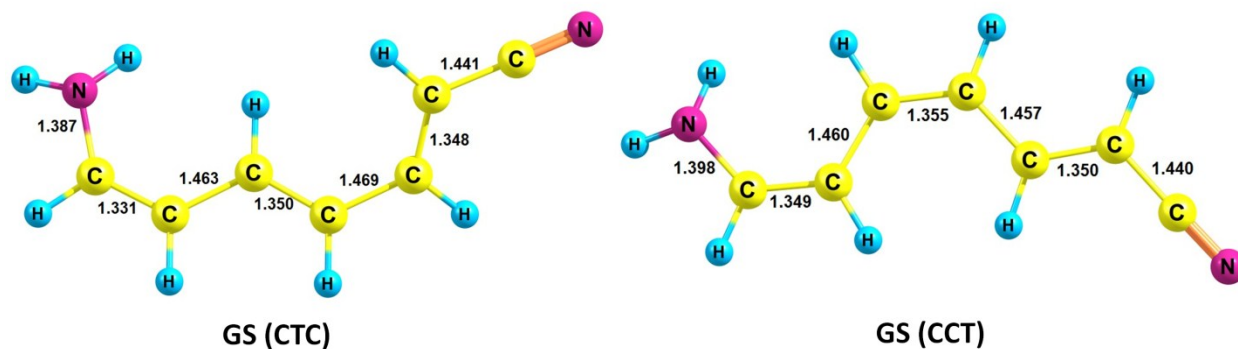

Figure S2: Optimized ground state geometries of some less stable isomers of polyene I.

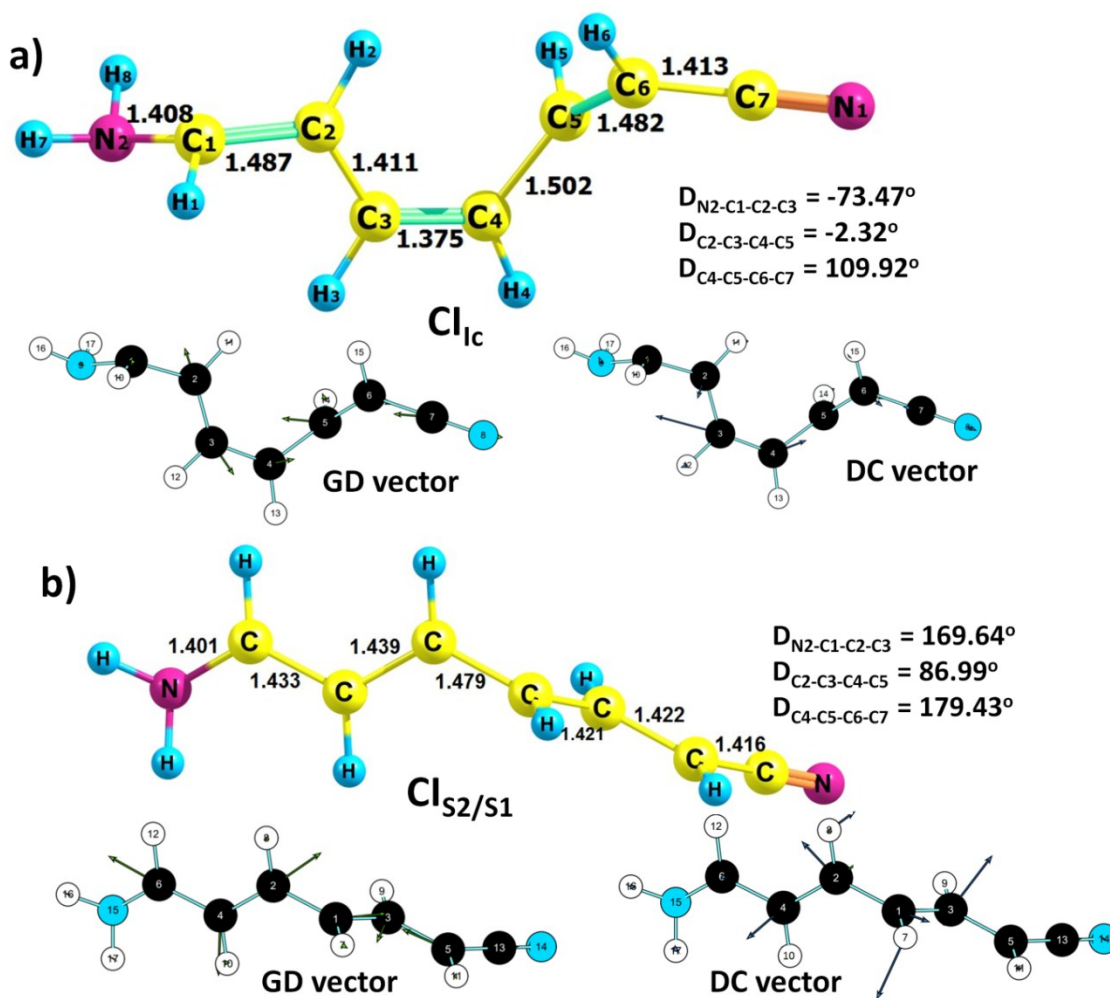

Figure S3: (a) Optimized conical intersection  $CI_{Ic}$  and (b)  $CI_{S2/S1}$  of polyene I with their gradient difference (GD) and derivative coupling (DC) vectors.

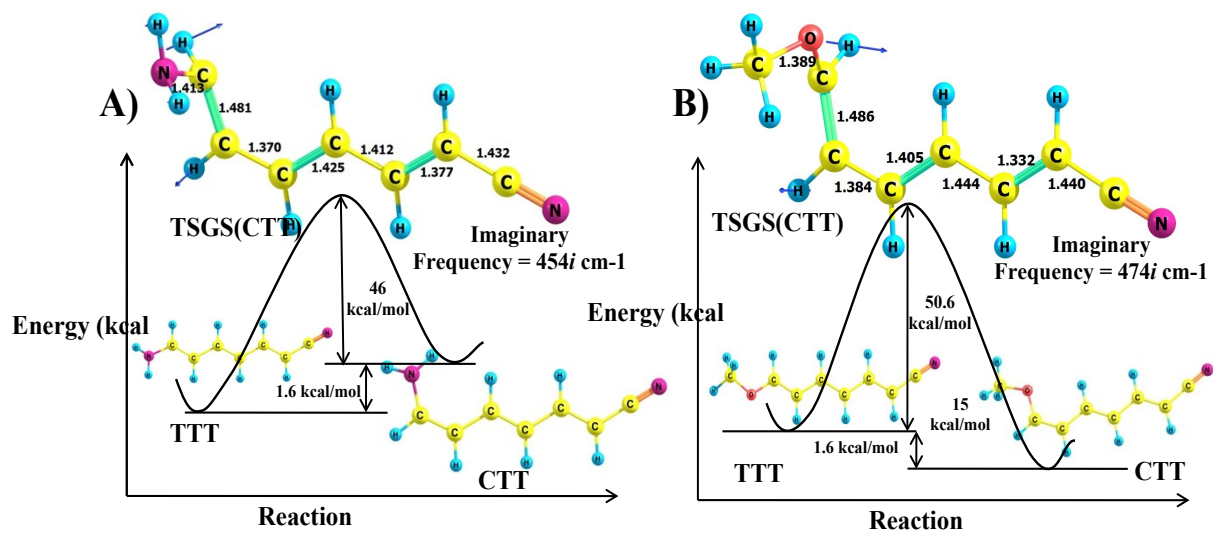

**Figure S4.** A schematic representation of the possible thermal *cis-trans* isomerization (TTT isomer to CTT isomer) of A) **polyene I** and B) **polyene II**
